# Supplementary material
Source: PubMed Central journal article supplement (PMC7917551)
Supplement: EMBJ-40-e106309-s001.pdf [file EMBJ-40-e106309-s001.pdf]

## Appendix: Table of Contents

|                    |       |
|--------------------|-------|
| Appendix Figure S1 | 2     |
| Appendix Figure S2 | 3-4   |
| Appendix Figure S3 | 5-6   |
| Appendix Figure S4 | 7-8   |
| Appendix Figure S5 | 9-10  |
| Appendix Figure S6 | 11    |
| Appendix Table S1  | 12-13 |
| Appendix Table S2  | 14-16 |



# Appendix Figure S2

**A**

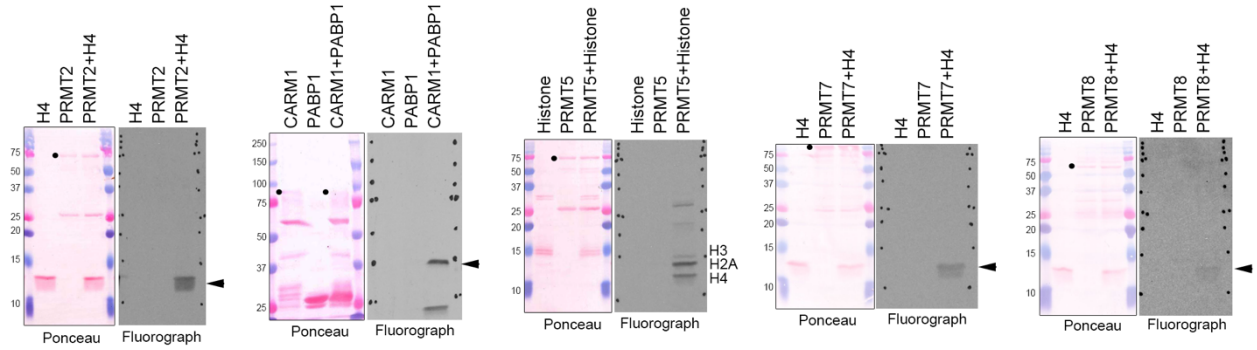

**B**

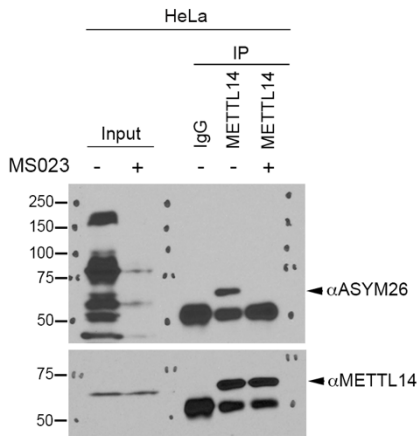

**C**

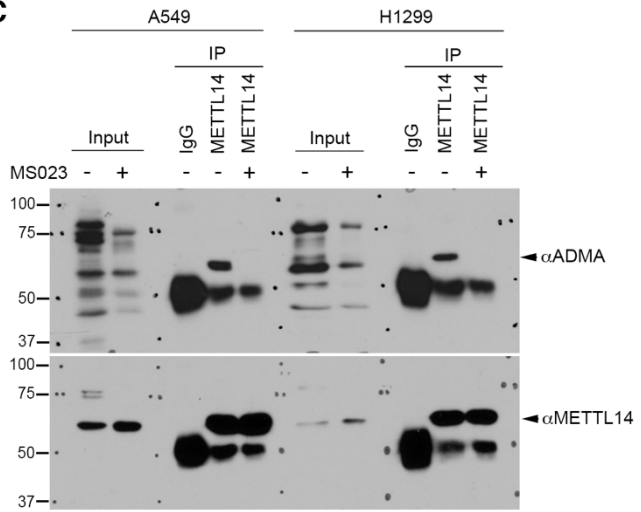

**D**

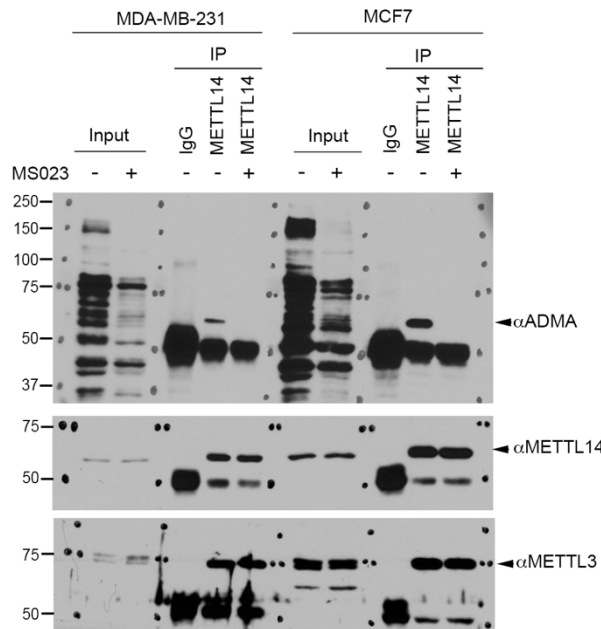

**Appendix Figure S2. Characterization of METTL14 arginine methylation *in vitro* and *in vivo*.**

(A) *In vitro* methylation assays were performed to confirm the activities of PRMTs used in Figure 1B. Recombinant proteins of PRMTs were incubated with their respective substrates, including histone H4 (H4), Polyadenylate-binding protein 1 (PABP1), and core histones. The Ponceau staining shows the loading of the recombinant proteins. Black dots indicate PRMT enzymes; triangles indicate fluorograph signals from substrate methylation. Human cervical cancer cell line HeLa (B), Lung cancer cell line A549 and H1299 (C), and breast cancer cell line MDA-MB231 and MCF7 (D) were either left untreated or treated with Type I PRMT inhibitor MS023 (1  $\mu$ M, 48 h). The level of METTL14 arginine methylation was detected by IP/Western blot analysis using indicated antibodies.

# Appendix Figure S3

**A**

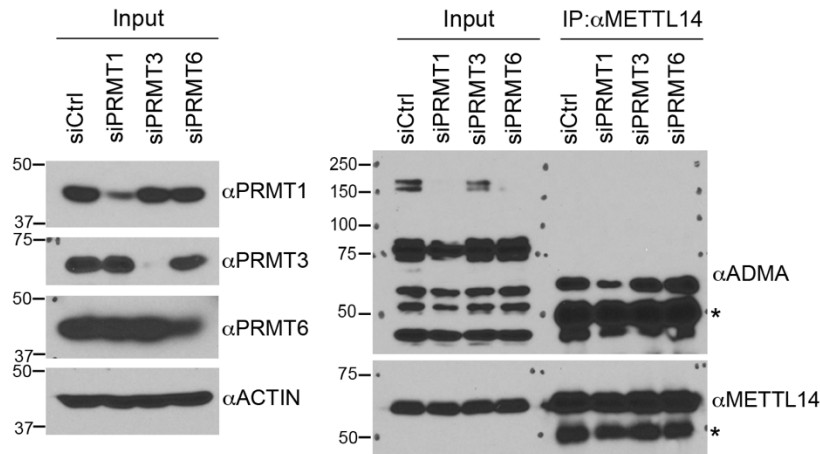

**B**

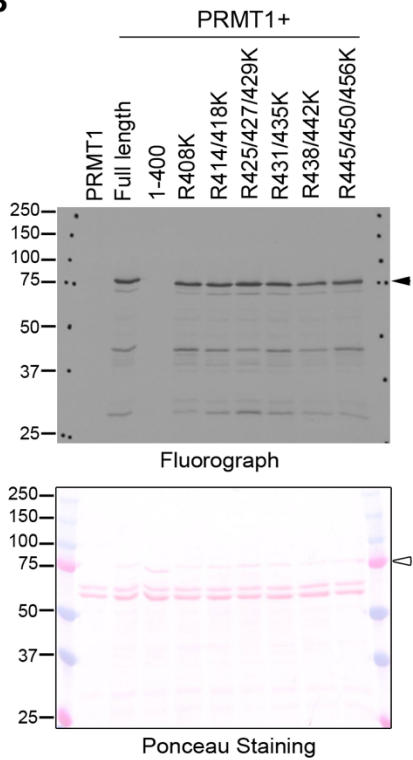

**C**

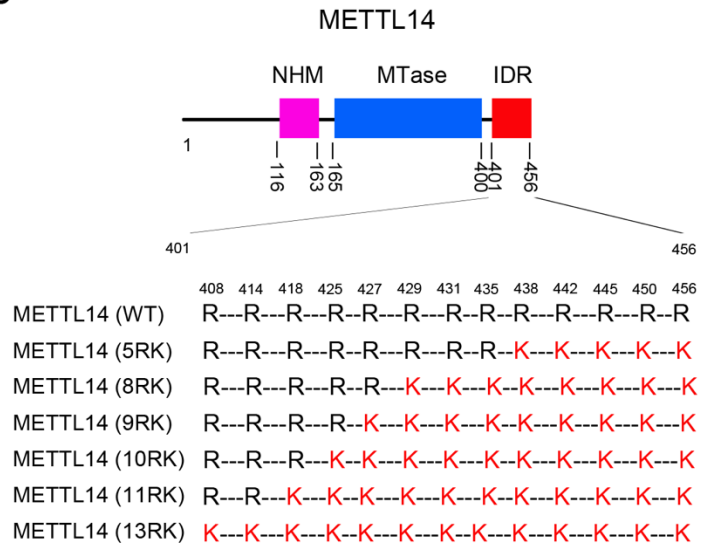

**Appendix Figure S3. Identification of PRMT1-catalyzed methylation sites on METTL14.**

- (A) PRMT1, but not PRMT3 and PRMT6, is responsible for METTL14 arginine methylation *in vivo*. The levels of METTL14 arginine methylation were compared in cells transfected with control siRNA (siCtrl), PRMT1-specific siRNA (siPRMT1), PRMT3-specific siRNA (siPRMT3), and PRMT6-specific siRNA (siPRMT6). The knockdown efficiency was confirmed by Western blot analysis of total cell lysates using indicated antibodies. The levels of METTL14 arginine methylation were detected by IP/WB analysis.
- (B) Selective mutation analysis of single, double, or triple arginine sites does not impair METTL14 methylation *in vitro*. The *in vitro* methylation assays were performed by incubating recombinant PRMT1 with purified GST-tagged WT, 1-400 truncation, and various arginine to lysine (R-to-K) METTL14 mutants. The Ponceau S staining shows the loading of the recombinant proteins used in the exact methylation assay.
- (C) Schematic representation of the mutated arginine residues in each METTL14 mutant constructs used in Figure 3B and Figure 3C.

# Appendix Figure S4

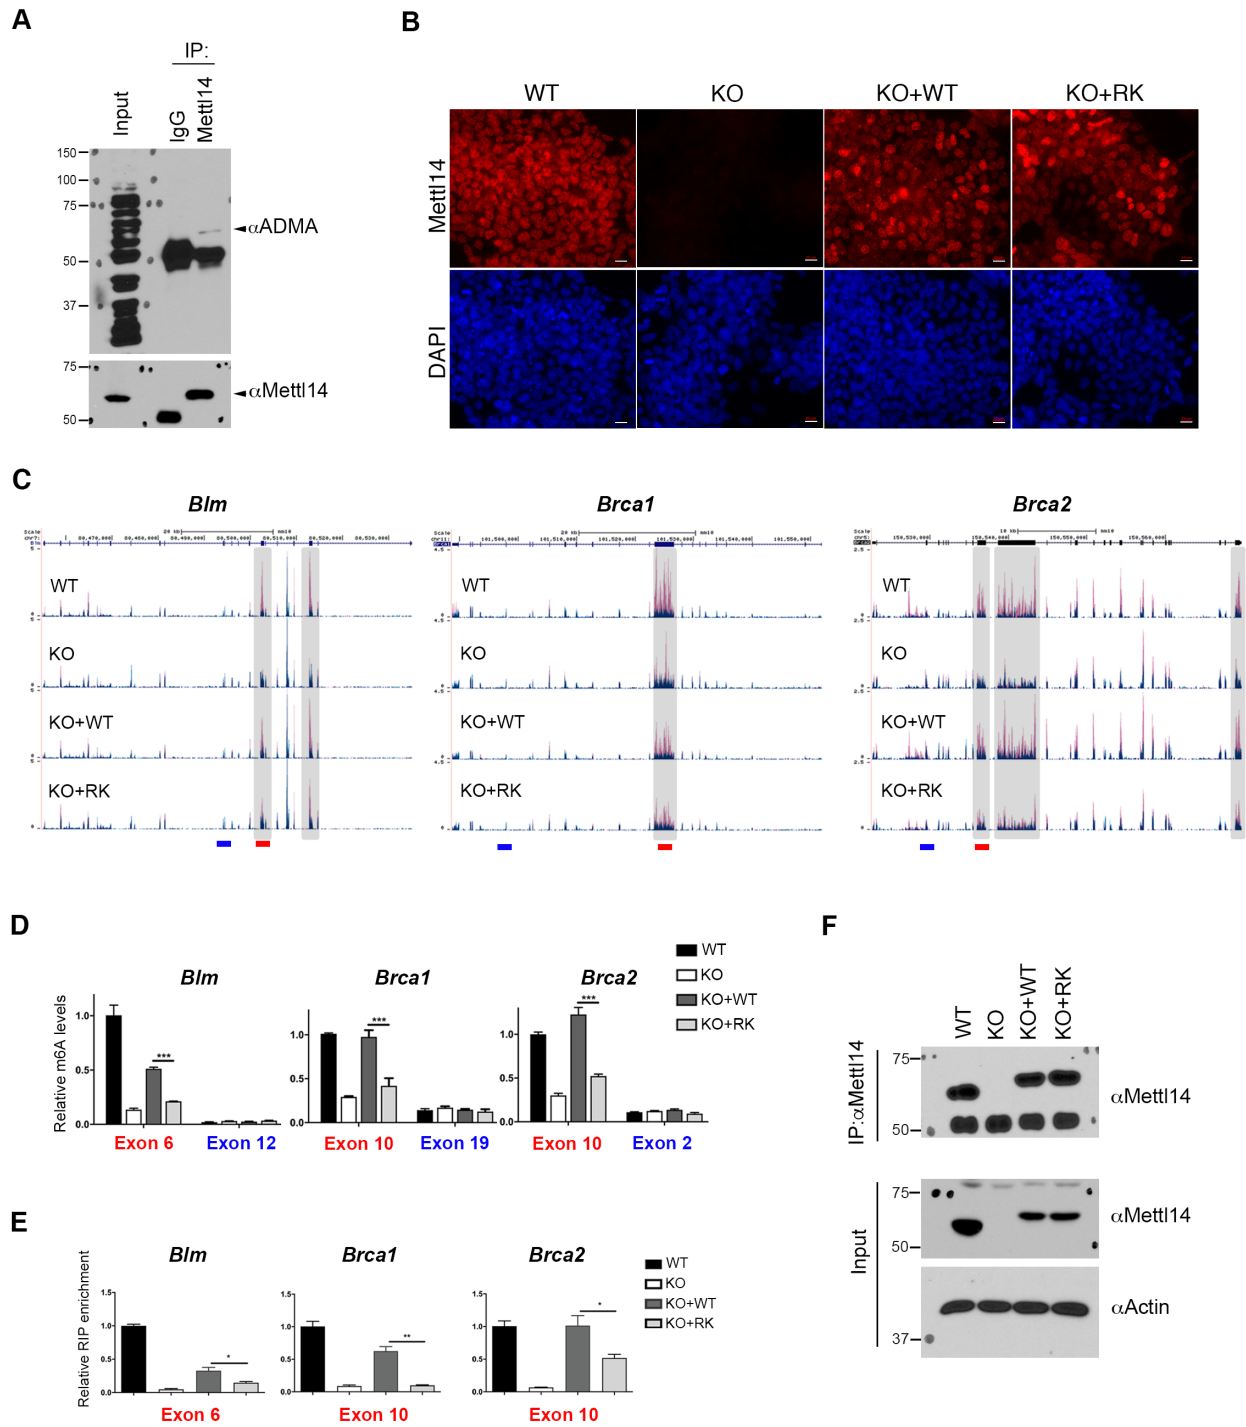

**Appendix Figure S4. Characterization of METTL14 arginine methylation-dependent m<sup>6</sup>A sites in mESCs.**

- (A) Detection of METTL14 arginine methylation in mESCs. METTL14 was immunoprecipitated from mESCs, and Western blot analysis was performed to detect its methylation using anti-ADMA and anti-METTL14 antibodies.
- (B) Detection of METTL14 expression in WT, *Mettl14* KO, KO+WT, KO+RK mESCs by immunofluorescence using an anti-METTL14 antibody. DAPI staining indicates the cell nucleus. Scale bar: 20  $\mu$ M
- (C) UCSC Genome Browser custom tracks of m<sup>6</sup>A-seq reads along the indicated mRNAs in WT, *Mettl14* KO, KO+WT, and KO+RK mESCs. The y-axis represents the normalized number of reads. Blue reads are from non-immunoprecipitated input libraries, and red reads are from m<sup>6</sup>A-IP libraries. Above the custom tracks, the thick blue boxes represent the protein coding regions (CDSs), the thin blue boxes represent the untranslated regions (UTRs), and the blue lines represent introns. The bars at the bottom of the custom tracks indicate the amplicon locations for MeRIP (m<sup>6</sup>A-IP)-qPCR assays (D) and METTL14 RIP-qPCR assays (E) to detect m<sup>6</sup>A-positive (red) and negative (blue) regions.
- (D) MeRIP (m<sup>6</sup>A-IP)-qPCR assays were performed for WT, *Mettl14* KO, KO+WT, and KO+RK mESCs to validate the MeRIP-seq results. Four target mRNAs encoded by genes in the Fanconi anemia pathway were analyzed. m<sup>6</sup>A-negative regions of the transcripts (blue) were included as negative controls. Data are shown as mean  $\pm$  SD from three biological replicates. \*\*\*,  $p < 0.001$ .
- (E) METTL14 RIP-qPCR assays were performed for WT, *Mettl14* KO, KO+WT, and KO+RK mESCs to compare the binding of WT and RK mutant METTL14 to the indicated mRNA targets. Primers (red color) that amplify m<sup>6</sup>A positive regions of the transcripts were used. Data are shown as mean  $\pm$  SD from three biological replicates. \*,  $p < 0.05$ ; \*\*,  $p < 0.01$ .
- (F) The amount of METTL14 protein immunoprecipitated in the RIP experiments described in Figure 6C and Appendix Figure S4E was detected by Western blot analysis.



# Appendix Figure S5

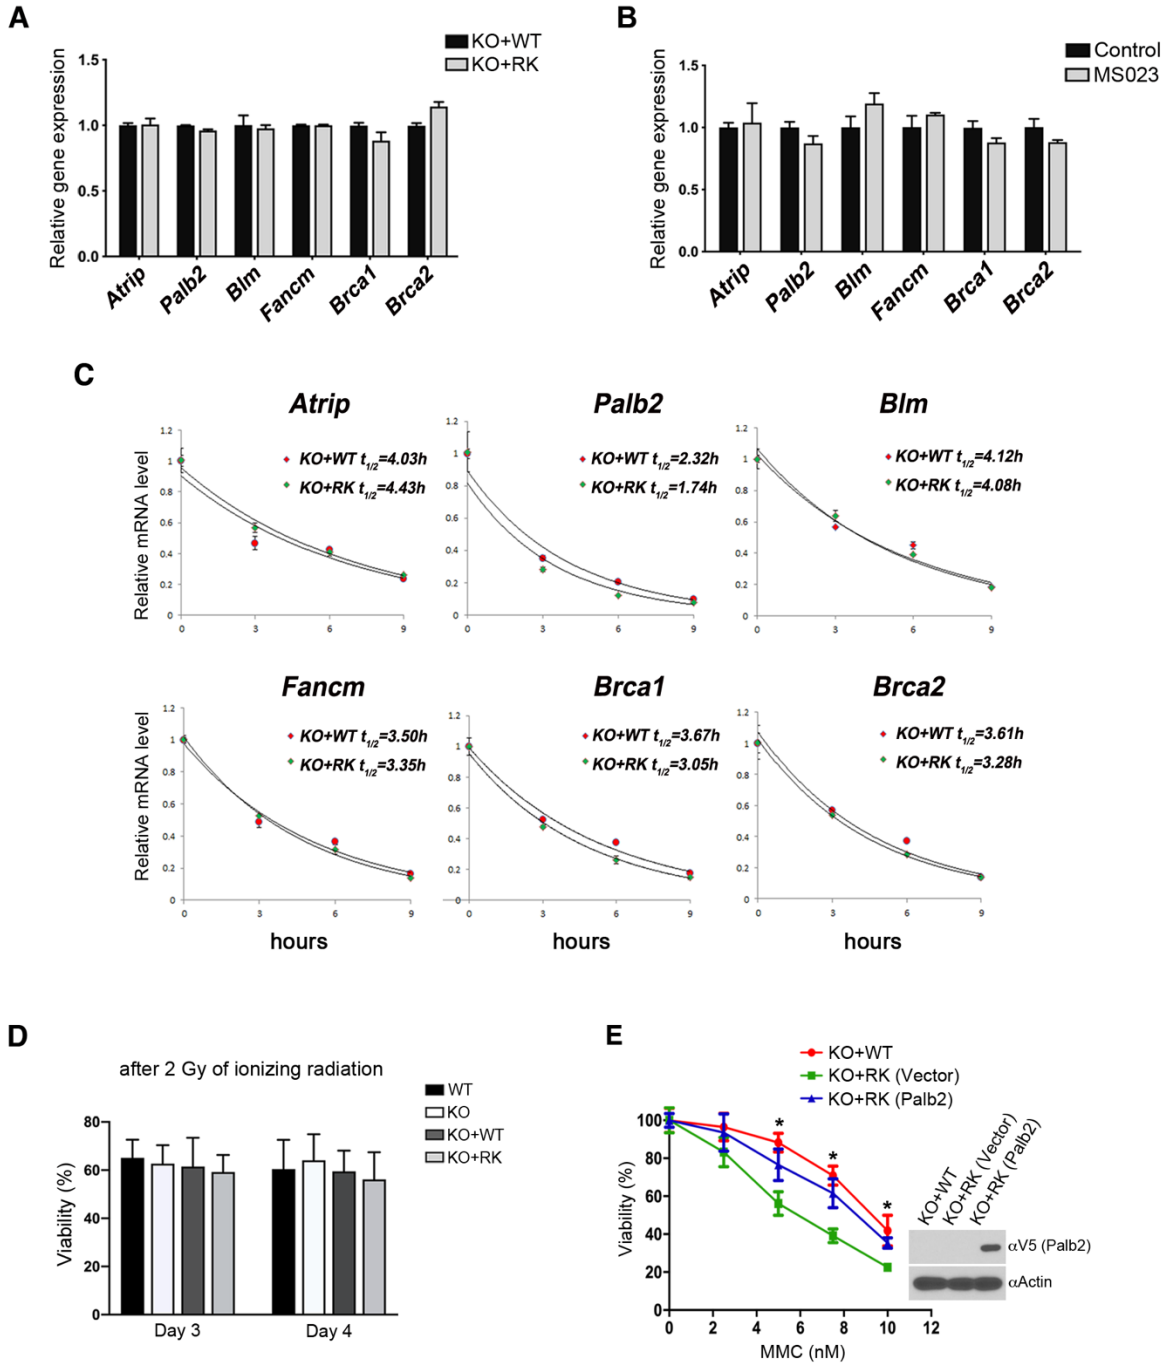

**Appendix Figure S5. Examine the impact of METTL14 arginine methylation loss on mRNA expression, stability, and cellular response to DNA damage.**

- (A) The mRNA levels of Fanconi anemia pathway genes were analyzed by RT-qPCR for mESCs expressing WT and RK mutant METTL14. Data are shown as mean  $\pm$  SD from three biological replicates.
- (B) The mRNA levels of Fanconi anemia pathway genes were analyzed by RT-qPCR for mESCs treated with DMSO (control) or type I PRMT inhibitor (MS023). Data are shown as mean  $\pm$  SD from three biological replicates.
- (C) mRNA half-life assays were performed to compare the mRNA stability of genes involved in the Fanconi anemia pathway for mESCs expressing WT and RK mutant METTL14.
- (D) The viability of WT, *Mettl14* KO, KO+WT, and KO+RK mESCs was measured on days 3 and 4 after ionizing radiation (2 Gy).
- (E) The KO+RK mESCs transfected with V5-tagged Palb2, as well as KO+WT and KO+RK mESCs, were treated with various amounts of MMC. Cell viability was measured on day 4. The expression of transfected Palb2 was confirmed by Western blot analysis using an anti-V5 antibody. Data are shown as mean  $\pm$  SD from three biological replicates. \*,  $p < 0.05$ .

## Appendix Figure S6

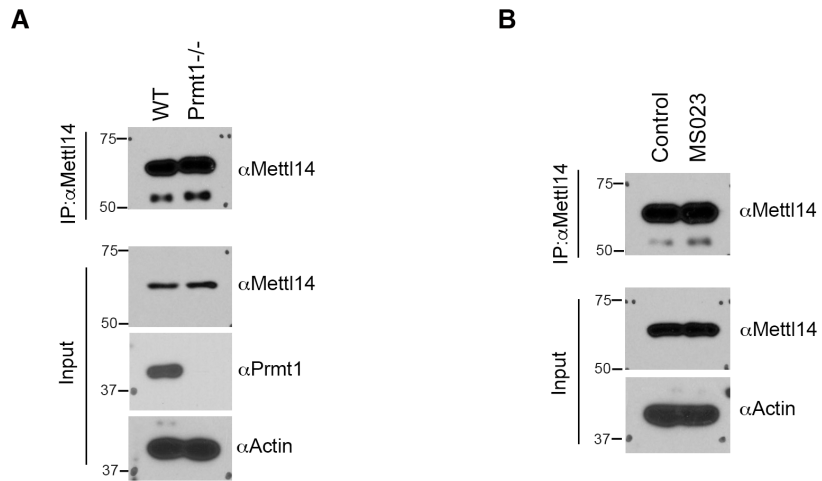

**Appendix Figure S6.** The amount of METTL14 protein immunoprecipitated in the RIP experiments performed in *Prmt1* KO (A) and MS023-treated (B) mESCs, as described in Figure EV5B, was detected by Western blot analysis.

**Appendix Table S1. Primers used in this study**

| Primer Name                             | Primer sequence (5'-3')                                                 |
|-----------------------------------------|-------------------------------------------------------------------------|
| <b>Cloning primers</b>                  |                                                                         |
| GST-METTL14 Forward                     | CGGGATCCATGGATAGCCGCTTGC                                                |
| GST-METTL14 Reverse                     | CCGCTCGAGTTATCGAGGTGGAAAG                                               |
| GST-METTL14 (1-400) Forward             | CGGGATCCATGGATAGCCGCTTGC                                                |
| GST-METTL14 (1-400) Reverse             | CCGCTCGAGTTAAGGCGATTTTGGTGC                                             |
| 3xFlag-METTL14 Forward                  | CCCAAGCTTATGGATAGCCGCTTGC                                               |
| 3xFlag-METTL14 Reverse                  | GGGGTACCTTATCGAGGTGGAAAG                                                |
| 3xFlag-METTL14 (1-400) Forward          | CCCAAGCTTATGGATAGCCGCTTGC                                               |
| 3Flag-METTL14 (1-400) Reverse           | GGGGTACCTTAAGGCGATTTTGGTGC                                              |
| GFP-WTAP Forward                        | CCGCTCGAGCTATGACCAACGAAGAAC                                             |
| GFP-WTAP Reverse                        | CGGGATCCTTACAAAACCTGAACC                                                |
| pLV-EF1a-IRES-Blast METTL14 Forward     | CGGGATCCATGGACTACAAAGACCATGA                                            |
| pLV-EF1a-IRES-Blast METTL14 Reverse     | CGGAATTCTTATCGAGGTGGAAAG                                                |
| HA-METTL14 Forward                      | CGGAATTCGGATGGATAGCCGCTTGC                                              |
| HA-METTL14 Reverse                      | CCGCTCGAGTTATCGAGGTGGAAAG                                               |
| <b>METTL14 site mutagenesis primers</b> |                                                                         |
| METTL14 R408K-Forward                   | CAAATCTAAATCTGAC <b>AAA</b> GGAGGTGGAGCTCCC                             |
| METTL14 R408K-Reverse                   | GGGAGCTCCACCTCC <b>TTT</b> GTCAGATTTAGATTTG                             |
| METTL14 R414K/R418K-Forward             | GGAGGTGGAGCTCCC <b>AAA</b> GGTGGAGGA <b>AAA</b> GGTGGAACTTCTGC          |
| METTL14 R414K/R418K-Reverse             | GCAGAAGTTCCACCT <b>TTT</b> TCTCCACCT <b>TTT</b> GGGAGCTCACCTCC          |
| METTL14 R425K/R427K/R429K-Forward       | GGAAGTCTGCTGGC <b>AAAGGAA</b> <b>AAAGAA</b> <b>AAAA</b> AATAGATCTAACTTC |
| METTL14 R425K/R427K/R429K-Reverse       | GAAGTTAGATCTATT <b>TTTTTCTTTTCC</b> <b>TTT</b> GCCAGCAGAGTTCC           |
| METTL14 R431K/R435K-Forward             | GGACGAGAAAGAAAT <b>AAA</b> TCTAACTTC <b>AAAGGAGAAA</b> GAGGTGGC         |
| METTL14 R431K/R435K-Reverse             | GCCACCTCTTCTCC <b>TTT</b> GAAGTTAGAT <b>TTT</b> ATTTCTTTCCTGTCC         |
| METTL14 R438K/R442K-Forward             | CTAACTCCGAGGAGAA <b>AAA</b> GGTGGCTTT <b>AAA</b> GGGGGCCGTGGAGGAG       |
| METTL14 R438K/R442K-Reverse             | CTCCTCCACGGCCCCC <b>TTT</b> AAAGCCACCT <b>TTT</b> TTCTCCTCGGAAGTTAG     |
| METTL14 R445K-Forward                   | GGCTTTAGAGGGGGC <b>AAA</b> GGAGGAGCACACAG                               |
| METTL14 R445K-Reverse                   | CTGTGTGCTCCTCC <b>TTT</b> GCCCCCTCTAAAGCC                               |
| METTL14 R450K-Forward                   | GTGGAGGAGCACAC <b>AAAGGTGGCTTTCCACCTC</b>                               |
| METTL14 R450K-Reverse                   | GAGGTGGAAAGCCACCT <b>TTT</b> GTGTGCTCCTCCAC                             |
| METTL14 R456K-Forward                   | GGTGGCTTTCCACCT <b>AAA</b> TAAGGTACCAGTCG                               |
| METTL14 R456K-Reverse                   | CGACTGGTACCTTAT <b>TTT</b> AGGTGGAAAGCCACC                              |
| <b>RT-qPCR primers</b>                  |                                                                         |
| Atrip-Forward                           | CTCATAAGGTCCGCCGATTAG                                                   |
| Atrip-Reverse                           | CTGCTCAGAAGGTGACAAAGA                                                   |
| Blm-Forward                             | TGTGATTCATGCATCTCTTCCTAAA                                               |
| Blm-Reverse                             | CAGCTCGGCCGATTCT                                                        |

|                         |                            |
|-------------------------|----------------------------|
| Brca1-Forward           | GGAGATGTTGTGACTGGAAGAA     |
| Brca1-Reverse           | GTGAAGGGCTCACAAACAATAGA    |
| Brca2-Forward           | TCCCCCTACCATCAGTTTG        |
| Brca2-Reverse           | CAGTGGTAGAGTTTGACTTCGTTCTT |
| Fancm-Forward           | GGCAGAACGTGTCCAAGATTG      |
| Fancm-Reverse           | GCGGAGCCTTTTCTGATGTT       |
| Palb2-Forward           | CTGGTGATGACAGTGAAAAGCAA    |
| Palb2-Reverse           | CAGGCCAAGCATAGCTTTTATATCT  |
| <b>RIP-qPCR primers</b> |                            |
| Atrip-Forward           | ATCTTTAGCAGTGGGTGCTG       |
| Atrip-Reverse           | GGTCCAGACTTGTGCAGATAC      |
| Blm-Forward             | GGAAGATTTGCTGGCTGGAA       |
| Blm-Reverse             | ACGGCCAGGCTTCCTAT          |
| Brca1-Forward           | GCTAACTGTGTGCACTGTACT      |
| Brca1-Reverse           | GAGGGACGATTTGAGAGACATAC    |
| Brca2-Forward           | CAGTGAAACAAGAAGACTGATGAA   |
| Brca2-Reverse           | GATCACTCTCTCTTAGTTCCATTT   |
| Fancm-Forward           | TGTGTCTGGAAGGCATTCTG       |
| Fancm-Reverse           | GGGATTGGTGATATGGCTCTAC     |
| Palb2-Forward           | GAGGTGCGGGCTGATTT          |
| Palb2-Reverse           | CCAGGACCTGCTGGAAAG         |

**Appendix Table S2. Key reagents used in this study**

| REAGENT or RESOURCE                                                      | SOURCE                           | IDENTIFIER   |
|--------------------------------------------------------------------------|----------------------------------|--------------|
| <b>Antibodies</b>                                                        |                                  |              |
| Rabbit anti-METTL14 antibody                                             | Sigma                            | HPA038002    |
| Rabbit anti-METTL3 antibody                                              | Bethyl Laboratories              | A301-567A    |
| Mouse anti-RNA Pol II antibody                                           | Active Motif                     | 102660       |
| Rat anti-RNA Pol II (pSer2) antibody                                     | Active Motif                     | 91115        |
| Mouse anti-RNA Pol II (pSer5) antibody                                   | Santa Cruz Biotechnology         | sc-47701     |
| Rabbit Asymmetric Di-Methyl Arginine antibody                            | Cell Signaling Technology        | 13522        |
| Rabbit anti-ADMA (ASYM26) antibody                                       | A gift from Dr. Stéphane Richard |              |
| Rabbit anti-m6A antibody                                                 | Synaptic Systems                 | 202003       |
| Mouse anti-Flag antibody                                                 | Sigma                            | F3165        |
| Mouse anti-GFP antibody                                                  | Santa Cruz Biotechnology         | sc-9996      |
| Rabbit anti-GFP antibody                                                 | Invitrogen                       | A6455        |
| Mouse anti-HA antibody                                                   | Biolgend                         | 901513       |
| Rabbit anti-HA antibody                                                  | Cell Signaling Technology        | 3724S        |
| Rabbit anti-PRMT1 antibody                                               | Bethyl Laboratories              | A300-722A    |
| Rabbit anti-PRMT3 antibody                                               | A gift from Dr. Mark T. Bedford  |              |
| Rabbit anti-PRMT6 antibody                                               | IMGEX                            | IMG-506      |
| Rabbit anti-Atrip antibody                                               | ABClonal                         | A7139        |
| Rabbit anti-Fancm antibody                                               | Proteintech                      | 12954-1-AP   |
| Rabbit anti-Palb2 antibody                                               | Proteintech                      | 14340-1-AP   |
| Mouse anti- $\beta$ -Actin antibody                                      | Sigma                            | A2228        |
| Normal Rabbit IgG                                                        | Cell Signaling Technology        | 2729         |
| Normal Mouse IgG                                                         | Santa Cruz Biotechnology         | sc-2025      |
| Goat anti-Mouse Alexa Fluor 555 Secondary Antibody                       | Invitrogen                       | A-21422      |
| Goat Anti-Mouse HRP Secondary Antibody                                   | Invitrogen                       | 62-6520      |
| Donkey Anti-Rabbit HRP Secondary Antibody                                | GE Healthcare                    | NA934V       |
| <b>Bacterial and Virus Strains</b>                                       |                                  |              |
| E. coli DH5 $\alpha$                                                     | New England Biolabs              | C2987H       |
| E. coli BL21                                                             | New England Biolabs              | C2530H       |
| NEB <sup>®</sup> Stable Competent E. coli                                | New England Biolabs              | C3040H       |
| <b>Chemicals, Peptides, and Recombinant Proteins</b>                     |                                  |              |
| S-adenosyl-L-[methyl- <sup>3</sup> H] methionine, (SAM[ <sup>3</sup> H]) | PerkinElmer                      | NET155V250UC |
| MS023                                                                    | Selleck Chemicals                | S8112        |
| Adox                                                                     | APExBIO                          | B6120        |
| Cisplatin                                                                | APExBIO                          | A8321        |
| MMC                                                                      | Cayman Chemical                  | 11435        |
| Blasticidin                                                              | Selleck Chemicals                | S7419        |
| RNase A                                                                  | Thermo Scientific                | EN0531       |
| Recombinant Mouse LIF                                                    | Gemini Bio                       | 400-495      |
| 3x Flag Peptide                                                          | APExBIO                          | A6001        |
| DAPI                                                                     | Sigma                            | D9542        |
| Recombinant 3xFlag-METTL14                                               | This study                       | N/A          |
| Recombinant 3xFlag-METTL3                                                | This study                       | N/A          |
| Recombinant GST-METTL14 (WT)                                             | This study                       | N/A          |
| Recombinant GST-METTL14 (1-400)                                          | This study                       | N/A          |
| Recombinant GST-METTL14 (R408K)                                          | This study                       | N/A          |

|                                                                             |                                |             |
|-----------------------------------------------------------------------------|--------------------------------|-------------|
| Recombinant GST-METTL14 (R414K/R418K)                                       | This study                     | N/A         |
| Recombinant GST-METTL14 (R425K/R427K/R429K)                                 | This study                     | N/A         |
| Recombinant GST-METTL14 (R431K/R435K)                                       | This study                     | N/A         |
| Recombinant GST-METTL14 (R438K/R442K)                                       | This study                     | N/A         |
| Recombinant GST-METTL14 (R445K/R450K/R456K)                                 | This study                     | N/A         |
| Recombinant GST-PRMT1                                                       | This study                     | N/A         |
| Recombinant GST-PRMT2                                                       | This study                     | N/A         |
| Recombinant GST-PRMT3                                                       | This study                     | N/A         |
| Recombinant GST-CARM1                                                       | This study                     | N/A         |
| Recombinant Myc-PRMT5                                                       | This study                     | N/A         |
| Recombinant GST-PRMT6                                                       | This study                     | N/A         |
| Recombinant GST-PRMT7                                                       | This study                     | N/A         |
| Recombinant GST-PRMT8                                                       | This study                     | N/A         |
| <b>Critical Commercial Assays</b>                                           |                                |             |
| Cell Counting Kit-8                                                         | Dojindo Molecular Technologies | CK04-20     |
| Alkaline Phosphatase Staining Kit                                           | BioPioneer                     | SC-003      |
| Streptavidin 96-well scintillant coated microplate                          | PerkinElmer                    | SMP103001PK |
| High-Capacity cDNA Reverse Transcription Kit                                | Applied Biosystems             | 4368813     |
| Power SYBR™ Green PCR Master Mix                                            | Applied Biosystems             | 4367659     |
| Streptavidin agarose beads                                                  | Millipore                      | 16-126      |
| Anti-FLAG® M2 Magnetic Beads                                                | Sigma                          | M8823       |
| <b>Experimental Models: Cell Lines</b>                                      |                                |             |
| HEK-293                                                                     | ATCC                           | CRL-1573    |
| Hela                                                                        | ATCC                           | CCL-2       |
| MCF7                                                                        | ATCC                           | HTB-22      |
| MDA-MB-231                                                                  | ATCC                           | HTB-26      |
| A549                                                                        | ATCC                           | CCL-185     |
| H1299                                                                       | ATCC                           | CRL-5803D   |
| Mettl14 WT Mouse embryonic stem cells                                       | A gift from Dr. Jacob Hanna    |             |
| Mettl14 KO Mouse embryonic stem cells                                       | A gift from Dr. Jacob Hanna    |             |
| Mettl14 KO+WT Mouse embryonic stem cells                                    | This study                     | N/A         |
| Mettl14 KO+5RK Mouse embryonic stem cells                                   | This study                     | N/A         |
| Mettl14 KO+13RK Mouse embryonic stem cells                                  | This study                     | N/A         |
| <b>Oligonucleotides</b>                                                     |                                |             |
| Biotin labeled GGACU RNA:<br>5'UACACUCGAUCUGGACUAAAGCUGCUC3'                | IDT                            | N/A         |
| FAM labeled GGACU RNA:<br>5'UACACUCGAUCUGGACUAAAGCUGCUC3'                   | IDT                            | N/A         |
| PRMT1 siRNA                                                                 | Qiagen                         | SI02663493  |
| PRMT3 siRNA                                                                 | Dharmacon                      | J-026786-09 |
| PRMT6 siRNA                                                                 | Dharmacon                      | J-007773-05 |
| Other Oligonucleotides used in this study, please see Supplementary Table 4 |                                |             |
| <b>Recombinant DNA</b>                                                      |                                |             |
| pcDNA3/Flag-METTL14                                                         | Addgene                        | 53740       |
| pcDNA3/Flag-METTL3                                                          | Addgene                        | 53739       |
| p3xFlag-CMV7.1                                                              | Sigma                          | E7533       |
| p3xFlag-CMV7.1 METTL14 (WT)                                                 | This study                     | N/A         |

|                                            |               |          |
|--------------------------------------------|---------------|----------|
| p3xFlag-CMV7.1 METTL14 (1-400)             | This study    | N/A      |
| p3xFlag-CMV7.1 METTL14 (R408K)             | This study    | N/A      |
| p3xFlag-CMV7.1 METTL14 (R414K/R418K)       | This study    | N/A      |
| p3xFlag-CMV7.1 METTL14 (R425K/R427K/R429K) | This study    | N/A      |
| p3xFlag-CMV7.1 METTL14 (R431K/R435K)       | This study    | N/A      |
| p3xFlag-CMV7.1 METTL14 (R438K/R442K)       | This study    | N/A      |
| p3xFlag-CMV7.1 METTL14 (R445K/R450K/R456K) | This study    | N/A      |
| p3xFlag-CMV7.1 METTL14 (5RK)               | This study    | N/A      |
| p3xFlag-CMV7.1 METTL14 (13RK)              | This study    | N/A      |
| pGEX-4T-1                                  | GE Healthcare | 28954549 |
| pGEX-4T-1-METTL14 (WT)                     | This study    | N/A      |
| pGEX-4T-1-METTL14 (1-400)                  | This study    | N/A      |
| pGEX-4T-1-METTL14 (R408K)                  | This study    | N/A      |
| pGEX-4T-1-METTL14 (R414K/R418K)            | This study    | N/A      |
| pGEX-4T-1-METTL14 (R425K/R427K/R429K)      | This study    | N/A      |
| pGEX-4T-1-METTL14 (R431K/R435K)            | This study    | N/A      |
| pGEX-4T-1-METTL14 (R438K/R442K)            | This study    | N/A      |
| pGEX-4T-1-METTL14 (R445K/R450K/R456K)      | This study    | N/A      |
| pGEX-4T-1-METTL14 (5RK)                    | This study    | N/A      |
| pGEX-4T-1-METTL14 (13RK)                   | This study    | N/A      |
| pCMV-HA                                    | Takara        | 635690   |
| HA-METTL14                                 | This study    | N/A      |
| HA-METTL14 13RK                            | This study    | N/A      |
| pEGFP-C1                                   | Clontech      | 6084-1   |
| GFP-WTAP                                   | This study    | N/A      |
| GFP-PRMT1                                  | This study    | N/A      |
| GFP-PRMT3                                  | This study    | N/A      |
| GFP-PRMT6                                  | This study    | N/A      |
| pLV-EF1a-IRES-Blast                        | Addgene       | 85133    |
| pLV-EF1a-IRES-Blast METTL14 WT             | This study    | N/A      |
| pLV-EF1a-IRES-Blast METTL14 5RK            | This study    | N/A      |
| pLV-EF1a-IRES-Blast METTL14 13RK           | This study    | N/A      |
